# Supplementary material for: Identification of a potential tumor suppressor gene, UBL3, in non-small cell lung cancer
Source: PubMed Central journal article supplement (PMC7142850; doi:10.20892/j.issn.2095-3941.2019.0279), 2020-02-15
Supplement: cbm-17-076-s001.pdf [file cbm-17-076-s001.pdf]

## Supplementary materials

**Table S1** Summary of the baseline demographic characteristics of the 108 patients with non-small cell lung cancer (NSCLC) in TCGA database

| Characteristics                       | Cases, <i>n</i> | UBL3-low, <i>n</i> (%) | <i>P</i> |
|---------------------------------------|-----------------|------------------------|----------|
| Total number                          | 108             | 76 (70.4)              |          |
| Age (years)                           |                 |                        |          |
| < 65                                  | 41              | 26 (63.4)              | 0.216    |
| ≥ 65                                  | 67              | 50 (74.6)              |          |
| Gender                                |                 |                        |          |
| Male                                  | 51              | 36 (70.6)              | 0.009    |
| Female                                | 57              | 26 (45.6)              |          |
| Smoking status                        |                 |                        |          |
| Smoker                                | 95              | 72 (75.8)              | 0.275    |
| Non-smoker                            | 7               | 4 (57.1)               |          |
| Not recorded                          | 6               | 4 (66.7)               |          |
| Histology                             |                 |                        |          |
| LUAD                                  | 58              | 30 (51.7)              | 4.86E-06 |
| LUSC                                  | 50              | 46 (92)                |          |
| TNM stage                             |                 |                        |          |
| I-II                                  | 85              | 57 (67.1)              | 0.092    |
| III-IV                                | 21              | 18 (85.7)              |          |
| Not recorded                          | 2               | 1 (50)                 |          |
| Anatomic subdivision of lung neoplasm |                 |                        |          |
| Upper                                 | 63              | 43 (68.3)              | 0.619    |
| Lower                                 | 37              | 27 (73)                |          |
| Middle                                | 4               | 4 (100)                |          |
| Not recorded                          | 4               | 2 (100)                |          |
| Vital status                          |                 |                        |          |
| Living                                | 56              | 32 (57.1)              | 0.002    |
| Dead                                  | 52              | 44 (84.6)              |          |

*P* values were calculated using a two-sided Fisher's exact test. "UBL3-low" indicates that the levels of UBL3 were lower in tumor tissues than in normal tissues. LUAD, lung adenocarcinoma; LUSC, lung squamous cell carcinoma.

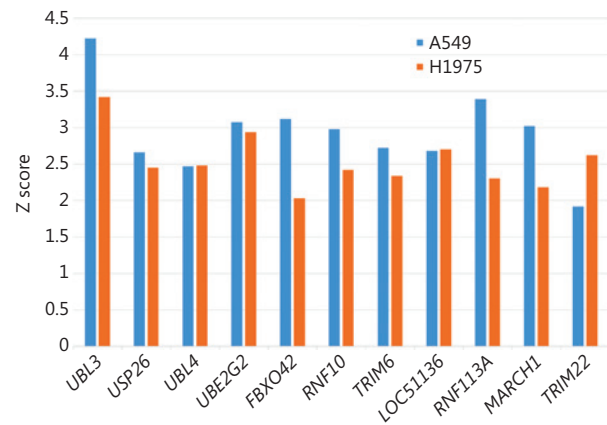

**Figure S1** The 11 UPGs that have a Z score of  $\geq 2$ .
